1 **Full title: Effect of different ambient temperatures on reproductive outcome and**  
2 **wellbeing of lactating females in two mouse strains.**

3

4 **Short title: Effect of ambient temperature on lactating mice.**

5

6 Thomas Kolbe <sup>1,2\*</sup>, Caroline Lassnig <sup>1,3</sup>, Andrea Poelzl <sup>3</sup>, Rupert Palme <sup>4</sup>, Kerstin E.  
7 Auer <sup>5</sup>, Thomas Rüllicke <sup>6</sup>

8

9 <sup>1</sup> Biomodels Austria, University of Veterinary Medicine Vienna, Vienna, Austria

10 <sup>2</sup> Department IFA-Tulln, University of Natural Resources and Life Sciences, Vienna,  
11 Austria

12 <sup>3</sup> Institute of Animal Breeding and Genetics, University of Veterinary Medicine  
13 Vienna, Vienna, Austria

14 <sup>4</sup> Unit of Physiology, Pathophysiology and Experimental Endocrinology,  
15 University of Veterinary Medicine Vienna, Vienna, Austria

16 <sup>5</sup> Institute of In-Vivo and In-Vitro Models, University of Veterinary Medicine Vienna,  
17 Vienna, Austria

18 <sup>6</sup> Department of Biomedical Sciences, University of Veterinary Medicine Vienna,  
19 Vienna, Austria

20

21 \* Corresponding author

22 Email: [thomas.kolbe@vetmeduni.ac.at](mailto:thomas.kolbe@vetmeduni.ac.at) (TK)

23

24

## 25 **Abstract**

26

27 Ambient temperature is an important non-biotic environmental factor influencing  
28 immunological and oncological parameters in laboratory mice. It is under discussion  
29 which temperature is more appropriate and whether the commonly used room  
30 temperature in rodent facilities of about 21°C represents a chronic cold stress or the  
31 30°C of the thermoneutral zone constitutes heat stress for the animals. In this study  
32 we selected the physiological challenging period of lactation to investigate the  
33 influence of a cage temperature of 20°C, 25°C, and 30°C, respectively, on reproductive  
34 performance and stress hormone levels in two frequently used mouse strains. We  
35 found that more pups were weaned from B6D2F1 hybrids compared to C57BL/6N  
36 mothers and that the number of weaned pups was strongly reduced if mothers of both  
37 strains were kept at 30°C. Furthermore, at 30°C mothers and pups showed reduced  
38 body weight at weaning and offspring had longer tails. Despite pronounced  
39 temperature effects on reproductive parameters, we did not find any impact on  
40 adrenocortical activity in breeding and control mice. Independent of the ambient  
41 temperature however, we found that females raising pups showed elevated levels of  
42 fecal corticosterone metabolites (FCMs) compared to controls. Increased levels of  
43 stress hormone metabolites were measured specially around birth and during the third  
44 week of lactation. Our results provide no evidence for reduced or improved wellbeing  
45 of lactating mice at different ambient temperatures, but we found that a 30°C cage  
46 temperature impairs reproductive performance.

47

## 48 **Introduction**

49

50 Aiming to study thermoregulatory behavior in mice Gordon and Coworkers [1] started  
51 a discussion about the optimal ambient temperature, which culminated in a widely  
52 noticed publication of Hylander and Repasky [2]. The authors emphasized in their  
53 paper the different results of immunological and oncological studies when conducted  
54 at 20°C or at 30°C. Consequently, the results of studies on mouse models for human  
55 diseases, performed at 20-26°C standard ambient temperature were questioned and  
56 considered to be temperature biased, because of low reproducibility if performed under  
57 higher ambient temperatures [3-6]. It is generally accepted that room temperature can  
58 influence experimental results, like many other biotic and non-biotic environmental  
59 factors [7]. However, some of the reported effects related to ambient temperature  
60 merge only when mice were heated up to a body temperature of 39-40°C for 6 h [8-  
61 12] or to 42°C for 40 min [13].

62 Although a comprehensive analysis about the appropriate ambient temperature for  
63 laboratory mice in experiments is still missing, the call for housing laboratory mice in  
64 their thermoneutral zone as standard ambient temperature arised. The thermoneutral  
65 zone is defined as a temperature range in which the general metabolism of the  
66 organism, in the absence of any physical activity, generates sufficient heat as a  
67 byproduct of the continually ongoing metabolism to maintain the predetermined body  
68 temperature [14]. Thermal physiology of nocturnal mice seems to be different between  
69 dark and light periods. Influenced by the circadian rhythm two diurnal changing discrete  
70 ambient temperatures are proposed as thermoneutral points (TNP): ~29°C in light  
71 phase and ~33°C in dark phase [15]. In initial tests mice preferred to stay in warmer  
72 areas of experimental settings even if nesting material was provided. These  
73 thermoregulatory experiments were conducted using a copper pipe with a wire mesh

74 inside [1] or an aluminium channel [16], heated at one side, cooled at the opposite  
75 side. This setup led to the assumption that mice prefer an ambient temperature near  
76 their homeothermic temperature of 30°C. In later studies, a more common laboratory  
77 mouse environment was used [17,18]. By offering bedding and nesting material it  
78 became obvious that the preferred ambient temperature depends on the activity of the  
79 mice and the amount and quality of nesting material [19-23]. With enough and useful  
80 nesting material mice can prevent their body from cooling down during resting periods  
81 [24]. Depending on activity, the body core temperature can change between 36°C and  
82 37°C [25]. Also, the homeothermic zone seems to be more a temperature point than a  
83 zone and varies about 4°C across the day. Temperatures below this homeothermic  
84 point lead to increased energy expenditures, whereas temperatures above lead to a  
85 rise in body temperature [15].

86

87 For a naked human being the thermoneutral zone is similar to that of mice and ranges  
88 between 28°C and 29°C [26]. But as soon as the human body is covered with light  
89 clothing (e.g. long sleeved shirt or blouse and light trousers) this range drops down to  
90 23°C - 25°C [27] or to 15°C - 25° with regular clothing (e.g. a business suit) [26].  
91 Offering mice bedding and nesting material for insulation could have a comparable  
92 effect as clothing in humans. Thus, mice can adapt to different ambient temperatures,  
93 given that sufficient bedding and nesting material is available. Moreover, they are able  
94 to adjust their body core temperature depending on activity and environmental  
95 conditions and are even able to survive ambient temperatures from -10°C to 32°C [28].  
96 Interestingly, this characteristic seems to be dependent on sex, strain, age or an  
97 interaction of these variables. For example, when kept at ambient temperatures  
98 between 20°C and 30°C, 6 months old C57BL/6 females showed a subcutaneous

99 temperature difference of 0.5°C [24]. In contrast, 2 months old CD1 males kept in this  
100 temperature range showed a 2°C difference [13], and no difference in body  
101 temperature was found in 6 weeks old BALB/c females between 20°C and 30°C  
102 ambient temperature [11]. Even between phases of activity and inactivity mouse body  
103 temperature differed in about 1°C [24,29-32]. And at 20°C, mouse body temperature  
104 was not influenced by the presence or absence of nesting material, only food  
105 consumption was increased in the absence of nesting material [20]. Age [33] and strain  
106 [34] can influence experimental data that are collected at homeothermic (30°C) or  
107 common facility temperatures (20°C).

108 However, the question, which temperature mice prefer in regard of their wellbeing, is  
109 still open. Tumor bearing mice, i.e. morbid animals, preferred higher temperatures,  
110 because their thermoregulation is potentially already defective [35]. In preference tests  
111 healthy mice spent more time in warmer surroundings when they were inactive, i.e.  
112 slept or rested, or when solely cage bedding was available [16]. If, however, nesting  
113 material was offered and mice had the possibility to carry it over into cages with  
114 different ambient temperatures they allocated it in cooler cages and used it for nest  
115 building to insulate themselves while resting [17]. However, even if nesting material  
116 was provided a preference for a warmer environment of adult female mice was  
117 observed especially in the inactive phase, compared to male mice of the same age  
118 [36]. Possible effects of ambient temperatures on animal welfare have been addressed  
119 [29,30,32] and reproductive parameters like birth rate, weaning rate and embryo quality  
120 were investigated in relation to this environmental factor in mice [21,22,37,38]. Also,  
121 increased sleeping apneas [39] and behavioral changes, such as increased male  
122 aggression [40] were reported for mice in studies with higher ambient temperature.

123 Toth and coworkers [32] were the first to investigate the impact of ambient  
124 temperatures on animal welfare by measuring fecal corticosterone metabolites (FCMs)  
125 of mice kept at different room temperatures. Measuring FCMs is a proven non-invasive  
126 method to evaluate the animals' stress hormone levels [41-44]. In the above mentioned  
127 study no difference in FCM concentration was found in adult C57BL/6J female mice  
128 when maintained at ambient temperatures of 22°C, 26°C or 30°C, but it must be noted  
129 that their FCM method was not validated [32,44].

130 Unfortunately, there are no studies to our knowledge, regarding the optimal ambient  
131 temperature for the wellbeing of lactating mice. Lactation is a highly demanding  
132 metabolic process [45,46] accompanied by considerable metabolic heat production as  
133 a by-product. Knowing the optimal ambient temperature of lactating mice would be  
134 highly valuable to optimize animal keeping and conditions in breeding colonies.

135 In this study we therefore investigated the impact of different ambient temperatures  
136 (20°C, 25°C, and 30°C) on the reproductive performance and wellbeing of female  
137 inbred (C57BL/6N) and hybrid (B6D2F1) mice during lactation compared to non-  
138 pregnant controls. We measured glucocorticoid metabolite levels in feces, animal food  
139 consumption, amount of voided feces and individual body weight. The reproductive  
140 performance was assessed by comparing the number of implantation sites, the number  
141 of born and weaned offspring, as well as adult and pup weight. In addition, we  
142 measured offspring tail length at weaning.

143

## 144 **Materials and Methods**

### 145 **Animals and husbandry conditions**

146

147 A total of 30 male C57BL/6N (referred to as B6) and 30 male B6D2F1 (referred to as  
148 F1) at the age of 8 weeks and 60 female B6 and 60 female F1 at the age of 6 weeks  
149 were purchased from Janvier Laboratories, Laval, France. Mice were specific  
150 pathogen free (SPF) according to FELASA recommendations and maintained in a  
151 barrier rodent facility. Groups of 3 to 4 females and single males were housed 2 weeks  
152 in type II Macrolon® cages for acclimatization. The cages were lined with bedding  
153 (Lignocel® Select, Rettenmaier KG, Austria) and enriched with nesting material  
154 (Arbocel® Crinklets natural, Rettenmaier KG, Austria; PurZellin, Paul Hartmann  
155 GesmbH, Austria) (photoperiod 12L:12D). Food (V1534 for males, non-pregnant  
156 females and females without pups, V1124 for pregnant females and females with pups,  
157 Ssniff Spezialdiaeten GmbH, Germany) and tap water were available *ad libitum*.  
158 Experimental procedures were discussed and approved by the institutional ethics and  
159 welfare committee and granted by the national authority according to §§ 26ff. of the  
160 Animal Experiments Act, Tierversuchsgesetz 2012 – TVG 2012 under license number  
161 BMBWF-68-205/0162-V/3b/2019.

162

## 163 **Experimental temperature groups**

164

165 At the beginning all animals were housed at 20°C cage temperature under standard  
166 housing conditions as described above. To induce pregnancy in experimental mice  
167 females were mated bigam with a male of the same strain and checked daily for vaginal  
168 plugs. Every day, plug positive females were re-housed separated by strain in groups  
169 of 3 to 4. Within 4 days of permanent mating 37 females per strain were plug positive.  
170 These females were randomly assigned (12/12/13) to one of the temperature groups  
171 (30°/25°/20°C). In addition, 8 B6 and 8 F1 plug negative or non-mated females, and 8

172 B6 and 8 F1 males of the same age were used as controls for each temperature group.  
173 Seven days after the detection of a vaginal plug the group that was assigned to a 30°C  
174 cage temperature was transferred into an identical room next door with 25°C cage  
175 temperature for stepwise adaptation. After seven days, this group was finally re-located  
176 to an identical room next door with 30°C for the last week of pregnancy, birth and  
177 lactation. The second group was transferred to 25°C room 14 days after plug detection.  
178 The third group stayed in the room with 20°C cage temperature from the beginning  
179 and remained there until the end of the experiment (Fig 1). We expected pup births  
180 about 20 days after plug detection. Consequently, one week before the expected birth  
181 date all experimental and control animals were in rooms with their assigned cage  
182 temperature. Because birth took place between 18 to 21 days after plug detection the  
183 exact number of days under increased ambient temperatures before parturition differed  
184 slightly between animals of the respective temperature groups.

185

186 **Fig 1. Experimental time schedule.** Schematic description of the experimental  
187 manipulations and sample collections performed throughout the experiment.

188

## 189 **Experimental measurements**

190

191 Cage temperature was measured with five temperature loggers per room (DS1921G,  
192 Thermochron, OnSolution Pty Ltd, NSW, Australia) deposited in 5 cages on different  
193 rack levels. Measurements were recorded every two hours. Humidity was recorded  
194 two times a day (at weekends only once) with standard hygrometers at 3 different  
195 positions in the room. We monitored pregnancies, and recorded the day of birth, the  
196 number of pups per litter at birth and at weaning. Over a period of 4 weeks, i.e. from



197 last week of pregnancy until weaning, we measured animal food consumption once a  
198 week for 24 h. Therefore, we took the weight of the food in the hopper at the beginning  
199 and at the end of the 24 h period without spillage correction. Tail length of pups was  
200 measured on day 21 post birth with a digital caliper. Body weight of adults was  
201 measured at weaning using an electronic scale. For male and female controls the day  
202 of the first weaning in the experimental groups was used as reference. Individual pup  
203 weight of all litters was taken on the same day at a pup age between 16 to 21 days to  
204 assess intra-litter variation. For assessment of inter-litter-variation the whole litter  
205 weight was taken at weaning (d 20) and mean body mass was calculated by dividing  
206 the whole litter weight by the number of pups.

207

## 208 **Implantation sites**

209

210 In order to evaluate the number of born pups in relation to the number of implanted  
211 embryos we dissected the uteri of breeding females *post mortem* at the end of the  
212 study. We opened the uterine horns with scissors and stained the implantation sites  
213 with a few drops of 10% ammonia solution [47]. After a few minutes of reaction  
214 implantation sites, visible as dark spots, were counted.

215

216

## 217 **Analysis of fecal corticosterone metabolites and plasma** 218 **corticosterone**

219

220 We sampled feces daily starting at the same time to determine fecal corticosterone  
221 metabolites (FCMs) excreted during activity phase over night in all mice. We started  
222 sample collection a few days before females gave birth and continued until weaning of  
223 the pups. Sample collection for controls occurred at the same dates. Due to the high  
224 number of samples only two per mouse and week were analysed. The first two time  
225 points were 1-3 days prior to birth (because of differing birth dates). The third sample  
226 time point was for mothers on the day of birth and for corresponding controls at the  
227 same day. Sample time points 4-9 followed in 3-4 days intervalls. The last time point  
228 was the day of weaning (Fig 1).

229

230 For sample collection, mice were put individually into clean pipette boxes for 15  
231 minutes and fresh feces were collected. If the amount of voided feces during this time  
232 period was insufficient for analysis, respective mice were put into clean type III cages  
233 without bedding and the collection interval was prolonged for up to 30 minutes.  
234 Samples were stored at -20°C and FCMs were determined according to a routinely  
235 used protocol. Briefly, dried and homogenised feces were weighted and mixed with  
236 80% methanol, centrifuged, the supernatant was diluted and an aliquot was analysed  
237 in a well-established and validated 5 $\alpha$ -pregnane-3 $\beta$ ,11 $\beta$ ,21-triol-20-one enzyme  
238 immunoassay (EIA) [48,49].

239 Additionally, once a week a 24 h sample collection was performed. Therefore, animals  
240 were transferred to a fresh cage and after 24 h bedding and feces were collected and  
241 frozen. As voided feces were mixed with the fresh bedding we sorted the fecal pellets  
242 later by hand before weighing. The total amounts of excreted feces within 24 h was  
243 recorded in mice between temperature groups to be able to account for differences in  
244 food consumption and of droppings, respectively. If mice consume less food and

245 secrete fewer droppings, this might lead to increased concentrations of FCMs per gram  
246 feces and *vice versa*.

247 After weaning and for controls at an equivalent time point all mice were sacrificed and  
248 blood was collected by heart puncture. Serum was prepared and analysed for blood  
249 corticosterone. Plasma samples were extracted with diethyl-ether and analysed with a  
250 previously described corticosterone EIA [50].

251

## 252 **Statistical procedures**

253

254 Statistical analyses were performed with IBM SPSS Statistics 24.

255 To assess how cage temperature affected female reproduction we performed different  
256 models. First, we run a Generalized Linear Model (GLM) with a binomial distribution  
257 where we included the incidence of pregnancies as the dependent variable and we run  
258 a GLM with a poisson distribution, where we included the number of implantation sites,  
259 litter size at birth and at weaning as dependent variables. Finally, we performed Linear  
260 Models (LM), where we included litter weight at weaning, female body mass at  
261 weaning, mean pup body mass and pup tail lengths as dependent variables. Mouse  
262 strain and cage temperature were always included as fixed factors to all models and  
263 Least Significant Difference (LSD) Test was applied as post-hoc test to assess  
264 differences between temperature groups. We further tested whether the variation in  
265 individual pup body mass (SDs) within litters differed depending on their cage  
266 temperature with a Kruskal Wallis Test.

267

268 To assess how the experimental manipulations affected FCM levels, food consumption  
269 and feces production over the course of the experiment, we performed repeated

270 measures ANOVAs. We included individual FCM levels, the calculated amount of daily  
271 food consumption, and the repeatedly recorded daily feces production as dependent  
272 variables, cage temperature, strain, animal sex and female breeding status as fixed  
273 factors. To assess differences within groups Least Significant Difference (LSD) Test  
274 was applied as post-hoc test. Finally, we also assessed plasma corticosterone levels  
275 with a LM where we included cage temperature and mouse strain as fixed factors.  
276 We tested in all models if model assumptions were fulfilled and transformed data if  
277 necessary.

278

## 279 **Results**

### 280 **Cage temperature and room humidity**

281

282 Experimentally intended cage temperatures were constantly maintained. Relative  
283 humidity decreased with increasing ambient temperatures. At 30°C air temperature  
284 humidity was comparatively more fluctuating, but at all times within the range of 30%  
285 to 50%.

286

### 287 **Reproductive parameters**

288

289 Out of 74 females with a mating plug and additional two females without a plug, 54  
290 (71.1%) became pregnant and 22 plugged females (28.9%) did not show any signs of  
291 gestation. Pregnancy rates were not affected by cage temperature ( $\chi^2=4.24$ ,  $p=0.120$ ),  
292 but were significantly higher in F1 compared to B6 females ( $\chi^2=11.90$ ,  $p=0.001$ ; Table  
293 1).

294

295

296 **Table 1. Number of parturient B6 and F1 females per plug positive females that**

297 **were kept at 20°C, 25°C and 30°C.**

|    | 20°C  | 25°C  | 30°C  |
|----|-------|-------|-------|
| B6 | 7/13  | 3/12  | 9/12  |
| F1 | 11/13 | 11/12 | 11/12 |

298

299 Females gave birth to an average of 7.5 pups per litter and litter size at birth did not

300 differ between cage temperature (GLM:  $\chi^2=0.29$ ,  $p=0.863$ ) or female strain (GLM:

301  $\chi^2=1.63$ ,  $p=0.202$ ). Similarly, the number of female implantation sites (mean: 8.2) did

302 not differ between cage temperature (GLM:  $\chi^2=0.09$ ,  $p=0.957$ ) or female strain (GLM:

303  $\chi^2=0.16$ ,  $p=0.694$ ).

304 We found that cage temperature had a significant effect on the number of pups weaned

305 (GLM:  $\chi^2=7.19$ ,  $p=0.027$ ; Fig 2), and females kept at 30°C weaned fewer pups

306 compared to females kept at either 20°C ( $p=0.042$ ) or 25°C ( $p=0.002$ ). No difference

307 was found in the number of pups weaned in females kept at 20°C compared to 25°C

308 ( $p=0.197$ ). Also, F1 females weaned significantly more pups compared to B6 females

309 (GLM:  $\chi^2=14.8$ ,  $p<0.001$ ; Fig 2). The number of litters corresponds to the number of

310 females giving birth (Table 1).

311

312 **Fig 2. Boxplot of litter size at weaning in B6 (white boxes) and F1 hybrid (striped**

313 **boxes) females kept at 20°C, 25°C and 30°C. Dot = mild outlier ( $Q1-1.5*IQ$ , or**

314  $Q3+1.5*IQ$ ).

315

316 **Weight and tail length**

317

318 Similarly to litter size at weaning, we also observed that litter weight at weaning was  
319 significantly affected by cage temperature ( $F=17.71$ ,  $p<0.001$ ; Fig 3).

320 Females kept at 30°C showed significantly lower litter weaning weights compared to  
321 females kept at 25°C ( $p<0.001$ ) or 20°C ( $p<0.001$ ). No difference in litter weaning  
322 weight was detected between females kept at 25°C or 20°C ( $p=0.218$ ). Also, F1  
323 females weaned significantly heavier litters compared to B6 females ( $F=7.94$ ,  $p=0.007$ ;  
324 Fig 3), though F1 mothers were significantly lighter than B6 mothers ( $F=8.88$ ,  $p=0.005$ ;  
325 Fig 4). Female body mass was also affected by cage temperature ( $F=70.64$ ,  $p<0.001$ ;  
326 Fig 4) and significantly declined with increasing temperatures (all post-hoc tests  
327  $p\leq 0.011$ ; see Supplement Information Fig S1).

328

329 **Fig 3. Boxplot of litter weight at weaning in B6 (white boxes) and F1 hybrid**  
330 **(striped boxes) females kept at 20°C, 25°C and 30°C.**

331

332 **Fig 4. Boxplot of female body mass at weaning in B6 (white boxes) and F1 hybrid**  
333 **(striped boxes) females kept at 20°C, 25°C and 30°C.** Only females that weaned  
334 pups are included in the graph. Dot = mild outlier ( $Q1-1.5*IQ$ , or  $Q3+1.5*IQ$ ), asterisk  
335 = extreme outlier ( $Q1-3*IQ$ , or  $Q3+3*IQ$ ).

336

337 Mean pup body mass also differed significantly between cage temperatures ( $F=13.39$ ,  
338  $p<0.001$ ; Fig 5) and was highest in the 25°C group, followed by the 20°C group and  
339 was lowest in the 30°C group (all post-hoc tests  $p\leq 0.025$ ). We did not detect any strain  
340 specific differences in mean pup body mass ( $F=3.34$ ,  $p=0.075$ ; Fig 5), and we did not

341 notice any differences in the within litter variation in body mass depending on cage  
342 temperature (Kruskall Wallis Test:  $p=0.389$ ).

343

344 **Fig 5. Boxplot of mean pup weight at weaning in B6 (white boxes) and F1 hybrid**  
345 **(striped boxes) females kept at 20°C, 25°C and 30°C. Asterisk = extreme outlier**  
346 **( $Q1-3*IQ$ , or  $Q3+3*IQ$ ).**

347

348 Finally, we found that the mean tail length of litters was affected by both, female strain  
349 ( $F=31.92$ ,  $p<0.001$ ; Fig 6) and cage temperature ( $F=67.32$ ,  $p<0.001$ ; Fig 6). Pups of  
350 F1 females had on average longer tails compared to offspring of B6 females and pups  
351 from mothers of both strains kept at 20°C had significantly shorter tails compared to  
352 pups from mothers kept at either 25°C ( $p<0.001$ ) or 30°C ( $p<0.001$ ). No difference in  
353 pup tail length was found between 25°C and 30°C ( $p=0.356$ ).

354

355 **Fig 6. Boxplot of mean tail length in pups weaned from B6 (white boxes) and F1**  
356 **hybrid (striped boxes) females kept at 20°C, 25°C and 30°C. Dot = mild outlier ( $Q1-$**   
357  **$1.5*IQ$ , or  $Q3+1.5*IQ$ ).**

358

## 359 **Food consumption and amount of feces**

360

361 When investigating animal food consumption, we found that F1 hybrid mice consumed  
362 on average significantly more food per day compared to B6 mice ( $F=21.12$ ,  $p<0.001$ ;  
363 Fig 7B). Also, daily food intake was affected by cage temperature ( $F=27.58$ ,  $p<0.001$ ;  
364 Fig 7A) and was reduced significantly with rising cage temperatures (all post-hoc tests:  
365  $p\leq 0.002$ ). In addition, food intake also varied between mice depending on their sex and

366 breeding status ( $F=49.56$ ,  $p<0.001$ ; Fig 7C). Experimental (breeding) females  
367 consumed significantly more food compared to mice from the control groups ( $p<0.001$ ).  
368 No difference was found between male and female control mice ( $p=0.535$ ). In line with  
369 the higher food consumption, F1 hybrids produced significantly more feces per day  
370 than B6 mice ( $F=19.48$ ,  $p<0.001$ ; Fig 8B). Moreover, feces production significantly  
371 decreased in parallel to food consumption with rising ambient temperatures ( $F=29.72$ ,  
372  $p<0.001$ ; Fig 8A; all post-hoc tests:  $p<0.001$ ). Finally, daily feces production varied  
373 between mice depending on their sex and breeding status ( $F=41.76$ ,  $p<0.001$ ; Fig 8C)  
374 and breeding females produced significantly more feces compared to mice from the  
375 control groups ( $p<0.001$ ). Again, no difference was seen between female and male  
376 control mice ( $p=0.539$ ).

377

378 **Fig 7. Mean ( $\pm$ SE) animal food consumption over a period of 4 weeks in male,**  
379 **non-reproducing female and reproducing female B6 and F1 mice kept at 20°C,**  
380 **25°C and 30°C.** (A) Food consumption in mice kept at 20°C (solid line), 25°C (dashed  
381 line) and 30°C (dotted line). (B) Food consumption in B6 (solid line) and F1 (dashed  
382 line) mice. (C) Food consumption in male (solid line), non-reproducing female (dashed  
383 line) and reproducing female (dotted line) mice.

384

385 **Fig 8. Mean ( $\pm$ SE) animal feces production per 24 h over 4 weeks in male, non-**  
386 **reproducing female and reproducing female B6 and F1 mice kept at 20°C, 25°C**  
387 **and 30°C.** (A) Feces production in mice kept at 20°C (solid line), 25°C (dashed line)  
388 and 30°C (dotted line). (B) Feces production in B6 (solid line) and F1 (dashed) mice.  
389 (C) Feces production in male (solid line), non-reproducing female (dashed line) and  
390 reproducing female (dotted line) mice.



391

## 392 **Fecal corticosterone metabolites (FCMs) and plasma**

### 393 **corticosterone**

394

395 FCM levels differed significantly between mouse strains ( $F=42.78$ ,  $p<0.001$ ; Fig 9B),  
396 as F1 mice showed constantly higher values compared to B6 mice. In addition, FCM  
397 levels differed significantly between mice depending on their sex and breeding status  
398 ( $F=305.86$ ,  $p<0.001$ ; Fig 9C): Breeding females showed significantly higher FCM levels  
399 compared to both, control females and males ( $p<0.001$ ) and control females showed  
400 significantly higher FCM levels compared to control males ( $p<0.001$ ). Interestingly,  
401 breeding females showed peak values in FCM levels at the time of birth and at weaning  
402 of their offspring. However, FCM levels did not differ between mice depending on their  
403 cage temperature ( $F=0.71$ ,  $p=0.493$ ; Fig 9A).

404

405 **Fig 9. Mean ( $\pm$ SE) FCMs over time in male, non-reproducing female and**  
406 **reproducing female B6 and F1 mice kept at 20°C, 25°C and 30°C.** FCMs= Fecal  
407 corticosterone metabolites. (A) FCM levels in mice kept at 20°C (solid line), 25°C  
408 (dashed line) and 30°C (dotted line). (B) FCM levels in B6 (solid line) and F1 (dashed  
409 line) mice. (C) FCM levels in male (solid line), non-reproducing female (dashed line)  
410 and reproducing female (dotted line) mice. Peak values were observed at birth (time  
411 point 3) and shortly before weaning (time point 8).

412

413 Finally, we observed that plasma corticosterone levels at the end of the experiment  
414 confirmed the findings of the FCM analysis and did not show any difference between  
415 strains ( $F=0.0$ ,  $p=0.997$ ) or temperature groups ( $F=2.89$ ,  $p=0.059$ ; data not shown).

416

## 417 **Discussion**

### 418 **Reproduction**

419

420 In our study we investigated the effect of different housing temperatures (20°C, 25°C,  
421 30°C) on breeding performance and stress levels in female C57BL/6N (B6) inbred and  
422 D2B6F1 (F1) hybrid mice.

423 As expected from hybrid vigor, we found that pregnancy rates after a four days mating  
424 period were significantly higher in F1 compared to B6 females. Neither pregnancy rate  
425 nor litter size at birth differed between experimental temperature groups, confirming  
426 that there was no bias in reproductive traits before the treatment started. This result is  
427 not surprising, because mating and the beginning of the pregnancy took place at 20°C  
428 for all experimental females. In line with this, cage temperature and strain had no effect  
429 on the number of implantation sites. The low number of 3 pregnant B6 females out of  
430 12 plugged after mating in the 25°C group seems to be merely an unfortunate  
431 divergence.

432

433 All measured postnatal parameters like litter size and mean pup body mass at weaning  
434 were significantly affected by cage temperature and reached their poorest outcome in  
435 females kept at 30°C. The low number of pregnant B6 females in the 25°C group was  
436 considered in the statistical tests. As expected, the proportion of weaned pups was  
437 higher in F1 compared to B6 females. Interestingly, the impact of a 30°C cage  
438 temperature on reproduction was more pronounced in B6 females, suggesting an  
439 increased sensitivity of this inbred strain to high ambient temperatures, whereas

440 hybrids seemed to better tolerate heat. The observed impact of higher ambient  
441 temperatures on reproduction is similar to results from Yamauchi and coworkers [37],  
442 who described decreased litter sizes and increased pup losses in ICR outbred mice  
443 kept at temperatures from 26°C to 32°C. In another study with SWISS mice, milk  
444 production at 33 °C was only 18% of that at 21 °C. This led to reductions in pup growth  
445 by 20% but only limited pup mortality (0.8%) was observed [51]. In contrast to our study  
446 with a heat exposure starting at the last third of pregnancy, Zhao and coworkers  
447 exposed the females and their litters only from day 6 postpartum to higher  
448 temperatures, whereas the pup losses in our study occurred only during the first 24  
449 hours after birth. In rats kept at 33°C [52] and hamsters kept at 30°C [53,54] a negative  
450 temperature effect was also observed on reproductive parameters. In our study the  
451 best reproductive results were found when females were kept at 25°C, though there  
452 was hardly any significant difference between 20°C and 25°C. Interestingly, F1 females  
453 showed consistently better reproductive outcomes compared to B6 and over all  
454 temperature groups, indicating that these hybrid females are better able to cope  
455 especially with higher temperatures.

456

## 457 **Physiological and morphological changes**

458

459 The cage temperature also influenced other physiological and morphological  
460 parameters like body weight of lactating mothers and tail length in pups. Females kept  
461 at 30°C were significantly lighter, compared to females at either 20°C or 25°C. The  
462 lower body weight at 30°C could be explained by the reduced food consumption in this  
463 group. In line with this, also mean pup body mass was significantly lower at 30°C  
464 compared to either 25°C or 20°C and is in accordance with other studies [55-57]. Pup

465 body mass is directly related to female body mass since the development of the  
466 mammary gland and lactation is dependent on adequate food intake. Alternatively, and  
467 not mutually exclusive, pup body mass can further be affected by the impact of the  
468 ambient temperature on the lactating mother: According to the heat dissipation limit  
469 hypothesis, females cannot dissipate enough metabolic heat at higher ambient  
470 temperatures and therefore limit milk production, which results in reduced pup weight  
471 [58,59]. This hypothesis was critically discussed by Sadowska and coworkers [60].  
472 Nevertheless, higher ambient temperatures lead to reduced mammary glands [61] and  
473 additionally to reduced energy, fat and total solids in the milk [62] resulting in reduced  
474 growth of sucklings. It was also shown that milk energy output and suckling time were  
475 lower at 30 °C independent from the litter size [63].

476

477 We further found that pups from mothers kept at either 25°C or 30°C had significantly  
478 longer tails compared to pups from mothers that were kept at 20°C. The finding of  
479 longer tails in mice reared at high temperatures was reported previously [16,64]. A  
480 recent paper challenged the general assumption that the hairless and rich  
481 vascularized tail of mice is an important structure for the dissipation of body heat [65].  
482 However, the observed elongation of the tail at this early developmental stage could  
483 be interpreted as an increase of the relative importance of the tail in its function to get  
484 rid of body heat under conditions of so-called homeothermy. This is an extremely quick  
485 adaptation, which was certainly facilitated by the postnatal growth period. Tail  
486 elongation as a so-called warm adaptation was also detectable in adult BALB/c females  
487 if juveniles from 5 weeks of age were henceforth permanently exposed to high ambient  
488 temperatures [15]. In addition, we also found that pups of hybrid females had on  
489 average longer tails than offspring of B6 females. The finding confirms the results of

490 Harrison and coworkers (1959) [64]. Because mean pup body weight at weaning was  
491 similar in the elevated temperature group in both strains, the more distinct tail  
492 elongation of hybrids indicates that the heterozygous background of hybrid mice  
493 facilitates a faster and better adaptation to increasing ambient temperatures than the  
494 homozygous inbred strain.

495

## 496 **Glucocorticoids**

497

498 FCM levels assessed from late pregnancy to weaning and plasma corticosterone  
499 levels at the end of the experiment did not differ between mice across cage  
500 temperature groups, suggesting that none of the chosen ambient temperatures was  
501 more or less stressful for the mice. Alternatively, mice might have perceived specific  
502 temperatures as stressful, but could have behaviorally adjusted to them, i.e. built a  
503 warm nest and spend more time in it at lower temperatures, or reduce their activity and  
504 try to cool at cage walls at higher temperatures. We did not permanently conduct  
505 observations to confirm behavioural adaptations. However, we noted reduced nest  
506 building activity in the 30°C group (see Supplement Information Fig S2).

507 We found that hybrid mice showed constantly higher FCM levels compared to B6 mice.  
508 This is an interesting observation, because the detected plasma corticosterone levels  
509 of blood samples taken one day later did not show any difference between temperature  
510 groups or strains. Differences in FCM levels between strains are known from another  
511 study [40] and might be explained by genetic differences and not by differences in  
512 experienced stress levels, as both strains were treated identically. We found that FCM  
513 levels differed significantly between mice depending on their sex and breeding status.

514 Sex differences in FCM levels are also well described [48,49] and our results confirm  
515 that males have generally lower values than females.

516 Not surprisingly, we further found a difference in FCM levels based on female  
517 reproductive status. Breeding females had significantly higher levels than control  
518 females. Interestingly, breeding females showed their peak values in FCM levels at the  
519 time of birth and in the third/last week of lactation. Similarly, a perinatal increase of  
520 FCM levels was also reported by Möstl and Palme [66].

521 It seems that birth itself, like in many other mammals, and the challenge between a  
522 decreasing milk supply at the end of the weaning period combined with an increasing  
523 food requirement in offspring is most stressful for reproducing females.

524 The question emerged whether more food intake and higher amounts of feces lead to  
525 lower FCM concentrations. Studies in cows [67] and rats [68] showed that increased  
526 food intake causes a higher metabolic rate, a higher glucocorticoid clearance rate, and  
527 therefore, more FCM excretion via feces. Interestingly, reproducing females, which  
528 consumed more food and produced more feces, still had higher FCM levels. Therefore,  
529 the FCM concentration in the feces is not dependent on the total amount of excreted  
530 feces and a correction in our study was not necessary.

531

## 532 **Conclusions**

533 It is unquestionable that ambient temperature can have a major impact on mouse  
534 physiology, from heart rate and blood pressure [7] to tumor growth [35,69,70] and  
535 immunological parameters [69,70]. However, also other external factors such as  
536 humidity, microbiological status, light intensity, noise, nutrition, and others are known  
537 to have an impact [71-74].

538 Our results showed that neither a low (20°C) nor a high cage temperature (30°C)  
539 resulted in changed stress hormone levels in experimental animals. Unlike the  
540 statement about ›permanent cold stress‹ of other authors [2,15] a cage temperature of  
541 20°C to 25°C was not connected to increased stress levels. Therefore, it may be  
542 concluded from our study that the ›cook‹ standard temperature in rodent facilities (21  
543 +/-1°C) has most likely no negative effect on animal welfare, as long as nest building  
544 material is provided. In contrast, high ambient temperatures can reduce the number of  
545 surviving pups and induce specific physiological adaptations (increased tail length,  
546 reduced body weight) when exceeding a certain level.  
547 Furthermore, room temperatures of around 30°C could be challenging for employees  
548 working tightly dressed in a mouse facility [38,75]. In consideration of our findings, we  
549 definitely cannot recommend a homeothermic cage temperature of 30°C for breeding  
550 mice.

551

## 552 **Supporting information**

553

554 **S1 Fig 1.** Examples of lactating B6 (a, c) and F1 (b, d) females in the third week at  
555 20°C (a, b) and 30° C (c, d).

556

557 **S1 Fig 2.** Examples of cages with B6 (a, c) and F1 (b, d) pups in the third week at  
558 20°C (a, b) and 30°C (c, d).

559

## 560 **Acknowledgements**

561 The excellent technical assistance of A. Peham for animal work and N. Krotky, T.

562 Bernthaler, D. Batkay, C. Winding-Zavadil, K. Slavnitsch and Edith Klobetz-Rassam

563 for lab work is gratefully acknowledged.

564

## 565 **References**

566

- 567 **1.** Gordon CJ, Becker P, Ali JS. Behavioral thermoregulatory responses of  
568 single- and group-housed mice. *Physiol Behav.* 1998; 65(2): 255–262.  
569 [doi:10.1016/s0031-9384\(98\)00148-6](https://doi.org/10.1016/s0031-9384(98)00148-6).
- 570 **2.** Hylander BL, Repasky EA. Thermoneutrality, mice, and cancer: A heated  
571 opinion. *Trends Cancer.* 2016; 2(4): 166-175.  
572 [doi:10.1016/j.trecan.2016.03.005](https://doi.org/10.1016/j.trecan.2016.03.005).
- 573 **3.** Jhaveri KA, Trammell RA, Toth LA. Effect of environmental temperature on  
574 sleep, locomotor activity, core body temperature and immune responses of  
575 C57BL/6J mice. *Brain Behav Immun.* 2007; 21(7): 975-987.  
576 [doi:10.1016/j.bbi.2007.03.007](https://doi.org/10.1016/j.bbi.2007.03.007).
- 577 **4.** Repasky EA, Evans SS, Dewhirst MW. Temperature matters! And why it  
578 should matter to tumor immunologists. *Cancer Immunol Res.* 2013; 1(4): 210-  
579 216. [doi:10.1158/2326-6066.CIR-13-0118](https://doi.org/10.1158/2326-6066.CIR-13-0118).
- 580 **5.** Giles DA, Ramkhelawon B, Donelan EM, Stankiewicz TE, Hutchison SB,  
581 Mukherjee R, Cappelletti M, Karns R, Karp CL, Moore KJ, Divanovic S.  
582 Modulation of ambient temperature promotes inflammation and initiates  
583 atherosclerosis in wild type C57BL/6 mice. *Mol Metab.* 2016; 5(11): 1121-  
584 1130. [doi:10.1016/j.molmet.2016.09.008](https://doi.org/10.1016/j.molmet.2016.09.008).
- 585 **6.** Hylander BL, Gordon CJ, Repasky EA. Manipulation of ambient housing  
586 temperature to study the impact of chronic stress on immunity and cancer in  
587 mice. *J Immunol.* 2019; 202(3): 631–636. [doi:10.4049/jimmunol.1800621](https://doi.org/10.4049/jimmunol.1800621).
- 588 **7.** Swoap SK, Overton JM, Garber G. Effect of ambient temperature on  
589 cardiovascular parameters in rats and mice: a comparative approach. *Am J*  
590 *Physiol Regul Integr Comp Physiol.* 2004; 287: R391–R396.  
591 [doi:10.1152/ajpregu.00731.2003](https://doi.org/10.1152/ajpregu.00731.2003).
- 592 **8.** Ostberg JR, Taylor SL, Baumann H, Repasky EA. Regulatory effects of fever-  
593 range whole-body hyperthermia on the LPS-induced acute inflammatory  
594 response. *J Leukoc Biol.* 2000; 68(6): 815-820. [doi:10.1189/jlb.68.6.815](https://doi.org/10.1189/jlb.68.6.815).
- 595 **9.** Ostberg JR, Gellin C, Patel R, Repasky EA. Regulatory potential of fever-  
596 range whole body hyperthermia on Langerhans cells and lymphocytes in an



- 597 antigen-dependent cellular immune response. *J Immunol.* 2001; 167(5): 2666-  
598 2670. [doi:10.4049/jimmunol.167.5.2666](https://doi.org/10.4049/jimmunol.167.5.2666).
- 599 **10.** Ostberg JR, Kaplan KC, Repasky EA. Induction of stress proteins in a panel of  
600 mouse tissues by fever-range whole body hyperthermia. *Int J Hyperthermia.*  
601 2002; 18(6): 552-562. [doi:10.1080/02656730210166168](https://doi.org/10.1080/02656730210166168).
- 602 **11.** Eng JW-L, Reed CB, Kokolus KM, Repasky EA. Housing temperature  
603 influences the pattern of heat shock protein induction in mice following mild  
604 whole body hyperthermia. *Int J Hyperthermia.* 2014; 30(8): 540-546.  
605 [doi:10.3109/02656736.2014.981300](https://doi.org/10.3109/02656736.2014.981300).
- 606 **12.** Zynda ER, Grimm MJ, Yuan M, Zhong L, Mace TA, Capitano M, Ostberg JR,  
607 Lee KP, Pralle A, Repasky EA. A role for the thermal environment in defining  
608 co-stimulation requirements for CD4(+) T cell activation. *Cell Cycle.*  
609 2015; 14(14): 2340-2354. [doi:10.1080/15384101.2015.1049782](https://doi.org/10.1080/15384101.2015.1049782).
- 610 **13.** Sareh H, Tulapurkar ME, Shah NG, Singh IS, Hasday JD. Response of mice  
611 to continuous 5-day passive hyperthermia resembles human heat acclimation.  
612 *Cell Stress Chaperones.* 2011; 16(3): 297-307.  
613 [doi:10.1007/s12192-010-0240-8](https://doi.org/10.1007/s12192-010-0240-8).
- 614 **14.** Cannon B and Nedergaard J. Nonshivering thermogenesis and its adequate  
615 measurement in metabolic studies. *J Exp Biol.* 2011; 214: 242-253.  
616 [doi:10.1242/jeb.050989](https://doi.org/10.1242/jeb.050989).
- 617 **15.** Skop V, Guo J, Liu N, Xiao C, Hall KD, Gavrilova O, Reitman ML. Mouse  
618 thermoregulation: Introducing the concept of the thermoneutral point. *Cell Rep.*  
619 2020; 31(2): 107501. [doi:10.1016/j.celrep.2020.03.065](https://doi.org/10.1016/j.celrep.2020.03.065).
- 620 **16.** Gordon CJ, Aydin C, Repasky EA, Kokolus KM, Dheyongera G, Johnstone  
621 AF. Behaviorally mediated, warm adaptation: a physiological strategy when  
622 mice behaviorally thermoregulate. *J Therm Biol.* 2014; 44: 41-46.  
623 [doi:10.1016/j.jtherbio.2014.06.006](https://doi.org/10.1016/j.jtherbio.2014.06.006).
- 624 **17.** Gaskill BN, Rohr SA, Pajor EA, Lucas JR, Garner JP. Some like it hot: Mouse  
625 temperature preferences in laboratory housing. *Appl Anim Behav Sci.*  
626 2009; 116: 279-285. [doi:10.1016/j.applanim.2008.10.002](https://doi.org/10.1016/j.applanim.2008.10.002).
- 627 **18.** Gaskill BN, Gordon CJ, Pajor EA, Lucas JR, Davis JK, Garner JP. Heat or  
628 insulation: Behavioral titration of mouse preference for warmth or access to a  
629 nest. *PLoS One.* 2012; 7(3): e32799. [doi:10.1371/journal.pone.0032799](https://doi.org/10.1371/journal.pone.0032799).

- 630 **19.** Gordon CJ. Effect of cage bedding on temperature regulation and metabolism  
631 of group-housed female mice. *Comp Med*. 2004; 54(1): 63-68.
- 632 **20.** Gaskill BN, Gordon CJ, Pajor EA, Lucas JR, Davis JK, Garner JP. Impact of  
633 nesting material on mouse body temperature and physiology. *Physiol Behav*.  
634 2013a; 110-111: 87-95. [doi:10.1016/j.physbeh.2012.12.018](https://doi.org/10.1016/j.physbeh.2012.12.018).
- 635 **21.** Gaskill BN, Karas AZ, Garner JP, Pritchett-Corning KR. Nest building as an  
636 indicator of health and welfare in laboratory mice. *J Vis Exp*. 2013b; 82:  
637 51012. [doi:10.3791/51012](https://doi.org/10.3791/51012).
- 638 **22.** Gaskill BN, Winnicker C, Garner JP, Pritchett-Corning KR. The naked truth:  
639 Breeding performance in nude mice with and without nesting material. *Appl*  
640 *Anim Behav Sci* 2013c; 143: 110-116. [doi:10.1016/j.applanim.2012.10.009](https://doi.org/10.1016/j.applanim.2012.10.009).
- 641 **23.** Gaskill BN, Pritchett-Corning KR, Gordon CJ, Pajor EA, Lucas JR, Davis JK,  
642 Garner JP. Energy reallocation to breeding performance through improved  
643 nest building in laboratory mice. *PLoS One*. 2013d; 8(9): e74153.  
644 [doi:10.1371/journal.pone.0074153](https://doi.org/10.1371/journal.pone.0074153).
- 645 **24.** Johnson JS, Taylor DJ, Green AR, Gaskill BN. Effects of nesting material on  
646 energy homeostasis in BALB/cAnNCrI, C57BL/6NCrI, and CrI:CD1(ICR) mice  
647 housed at 20°C. *J Am Assoc Lab Anim Sci*. 2017; 56(3): 254-259.
- 648 **25.** Maher RL, Barbash SM, Lynch DV, Swoap SJ. Group housing and nest  
649 building only slightly ameliorate the cold stress of typical housing in female  
650 C57BL/6J mice. *Am J Physiol Regul Integr Comp Physiol*. 2015; 308: R1070-  
651 R1079. [doi:10.1152/ajpregu.00407.2014](https://doi.org/10.1152/ajpregu.00407.2014).
- 652 **26.** Kingma BRM, Frijns AJH, Schellen L, Van Marken Lichtenbelt WD. Beyond  
653 the classic thermoneutral zone: Including thermal comfort. *Temperature*.  
654 2014; 1(2): 142–149. [doi:10.4161/temp.29702](https://doi.org/10.4161/temp.29702).
- 655 **27.** Speakman JR, Keijer J. Not so hot: Optimal housing temperatures for mice to  
656 mimic the thermal environment of humans. *Mol Metab*. 2012; 2(1): 5-9.  
657 [doi:10.1016/j.molmet.2012.10.002](https://doi.org/10.1016/j.molmet.2012.10.002).
- 658 **28.** Oufara S, Barré H, Rouanet JL, Chatonnet J. Adaptation to extreme ambient  
659 temperatures in cold-acclimated gerbils and mice. *Am J Physiol*. 1987; 253(1  
660 Pt 2): R39-45. [doi:10.1152/ajpregu.1987.253.1.R39](https://doi.org/10.1152/ajpregu.1987.253.1.R39)...
- 661 **29.** Van Bogaert MJ, Groenink L, Oosting RS, Westphal KG, van der Gugten J,  
662 Olivier B. Mouse strain differences in autonomic responses to stress. *Genes*  
663 *Brain Behav*. 2006; 5(2): 139-49. [doi:10.1111/j.1601-183X.2005.00143.x](https://doi.org/10.1111/j.1601-183X.2005.00143.x).

- 664 **30.** Van Loo PL, Kuin N, Sommer R, Avsaroglu H, Pham T, Baumans V. Impact of  
665 'living apart together' on postoperative recovery of mice compared with social  
666 and individual housing. *Lab Anim.* 2007; 41(4): 441-455.  
667 [doi:10.1258/002367707782314328](https://doi.org/10.1258/002367707782314328).
- 668 **31.** Abreu-Vieira G, Xiao C, Gavrilova O, Reitman ML. Integration of body  
669 temperature into the analysis of energy expenditure in the mouse. *Mol Metab.*  
670 2015; 4(6): 461-470. [doi:10.1016/j.molmet.2015.03.001](https://doi.org/10.1016/j.molmet.2015.03.001).
- 671 **32.** Toth LA, Trammell RA, Ilesley-Woods M. Interactions between housing density  
672 and ambient temperature in the cage environment: Effects on mouse  
673 physiology and behavior. *J Am Assoc Lab Anim Sci.* 2015; 54(6): 708-717.
- 674 **33.** Habicht GS. Body temperature in normal and endotoxin-treated mice of  
675 different ages. *Mech Ageing Dev.* 1981; 16(1): 97-104. [doi:10.1016/0047-  
676 6374\(81\)90037-3](https://doi.org/10.1016/0047-6374(81)90037-3).
- 677 **34.** Moragues V, Pinkerton H. Variation in morbidity and mortality of murine typhus  
678 infection in mice with changes in the environmental temperature. *J Exp Med.*  
679 1944; 79(1): 41-43. [doi:10.1084/jem.79.1.41](https://doi.org/10.1084/jem.79.1.41).
- 680 **35.** Kokolus KM, Capitano ML, Lee C-T, Eng JW-L, Waight JD, Hylander BL,  
681 Sexton S, Hong C-C, Gordon CJ, Abrams SI, Repasky EA. Baseline tumor  
682 growth and immune control in laboratory mice are significantly influenced by  
683 subthermoneutral housing temperature. *Proc Natl Acad Sci USA.* 2013;  
684 110(50): 20176-20181. [doi:10.1073/pnas.1304291110](https://doi.org/10.1073/pnas.1304291110).
- 685 **36.** Kaikaew K, Steenbergen J, Themmen APN, Visser JA, Grefhorst A. Sex  
686 difference in thermal preference of adult mice does not depend on presence of  
687 the gonads. *Biol Sex Differ.* 2017; 8:24. [doi:10.1186/s13293-017-0145-7](https://doi.org/10.1186/s13293-017-0145-7).
- 688 **37.** Yamauchi C, Fujita S, Obara T, Ueda T. Effects of room temperature on  
689 reproduction, body and organ weights, food and water intakes, and  
690 hematology in mice. *Exp Anim.* 1983; 32(1): 1-11.  
691 [doi:10.1538/expanim1978.32.1\\_1](https://doi.org/10.1538/expanim1978.32.1_1).
- 692 **38.** Helppi J, Schreier D, Naumann R, Zierau O. Mouse reproductive fitness is  
693 maintained up to an ambient temperature of 28 when housed in individually  
694 ventilated cages. *Lab Anim.* 2016; 50(4): 254-263.  
695 [doi:10.1177/0023677215611564](https://doi.org/10.1177/0023677215611564).

- 696 **39.** Berteotti C, Lo Martire V, Alvente S, Bastianini S, Matteoli G, Silvani A, Zoccoli  
697 G. Effect of ambient temperature on sleep breathing phenotype in mice: the  
698 role of orexins. *J Exp Biol.* 2020; jeb.219485. [doi:10.1242/jeb.219485](https://doi.org/10.1242/jeb.219485).
- 699 **40.** Greenberg G. The effects of ambient temperature and population density on  
700 aggression in two inbred strains of mice, *Mus musculus*. *Behaviour.*  
701 1972; 42(1): 119-130. [doi:10.1163/156853972x00130](https://doi.org/10.1163/156853972x00130).
- 702 **41.** Kolbe T, Palme R, Tichy A, Rüllicke T. Lifetime dependent variation of stress  
703 hormone metabolites in feces of two laboratory mouse strains. *PLoS ONE.*  
704 2015; 10(8): e0136112. [doi:10.1371/journal.pone.0136112](https://doi.org/10.1371/journal.pone.0136112).
- 705 **42.** Kolbe T, Sheety S, Walter I, Palme R, Rüllicke T. Impact of superovulation and  
706 mating on the wellbeing of juvenile and adult C57BL/6N mice. *Reprod Fert*  
707 *Dev* 2016; 28: 969–973. [doi:10.1071/RD14372](https://doi.org/10.1071/RD14372).
- 708 **43.** Razzoli M, Nyuyki-Dufe K, Gurney A, Erickson C, McCallum J, Spielman N,  
709 Marzullo M, Patricelli J, Kurata M, Pope EA, Touma C, Palme R, Largaespada  
710 DA, Allison DB, Bartolomucci A. Social stress shortens lifespan in mice. *Aging*  
711 *Cell.* 2018; 17(4): e12778. [doi:10.1111/accel.12778](https://doi.org/10.1111/accel.12778).
- 712 **44.** Palme R. Non-invasive measurement of glucocorticoids: Advances and  
713 problems. *Physiol Behav.* 2019; 199: 229-243.  
714 [doi:10.1016/j.physbeh.2018.11.021](https://doi.org/10.1016/j.physbeh.2018.11.021).
- 715 **45.** Gamo Y, Bernard A, Mitchell SE, Hambly C, Jothery AA, Vaanholt LM, Król E,  
716 Speakman JR. Limits to sustained energy intake. XVI. Body temperature and  
717 physical activity of female mice during pregnancy. *J Exp Biol.* 2013a; 216:  
718 2328- 2338. [doi:10.1242/jeb.078410](https://doi.org/10.1242/jeb.078410).
- 719 **46.** Gamo Y, Troup C, Mitchell SE, Hambly C, Vaanholt LM, Speakman JR. Limits  
720 to sustained energy intake. XX. Body temperatures and physical activity of  
721 female mice during lactation. *J Exp Biol.* 2013b; 216: 375137-61.  
722 [doi:10.1242/jeb.090308](https://doi.org/10.1242/jeb.090308).
- 723 **47.** Salewski E. Färbemethode zum makroskopischen Nachweis von  
724 Implantationsstellen am Uterus der Ratte. *Naunyn-Schmiedebergs Archiv für*  
725 *experimentelle Pathologie und Pharmakologie* 1964; 247(4): 367.  
726 [doi:10.1007/BF02308461](https://doi.org/10.1007/BF02308461).
- 727 **48.** Touma C, Sachser N, Mostl E, Palme R. Effects of sex and time of day on  
728 metabolism and excretion of corticosterone in urine and feces of mice.

- 729 Gen Comp Endocrinol. 2003; 130: 267–278. [doi:10.1016/s0016-](https://doi.org/10.1016/s0016-6480(02)00620-2)  
730 [6480\(02\)00620-2](https://doi.org/10.1016/s0016-6480(02)00620-2).
- 731 **49.** Touma C, Palme R, Sachser N. Analyzing corticosterone metabolites in fecal  
732 samples of mice: a noninvasive technique to monitor stress  
733 hormones. *Horm Behav.* 2004; 45: 10–22. [doi:10.1016/j.yhbeh.2003.07.002](https://doi.org/10.1016/j.yhbeh.2003.07.002).
- 734 **50.** Palme R, Möstl E. Measurement of cortisol metabolites in faeces of sheep as  
735 a parameter of cortisol concentration in blood. *Z Säugetierkd Int J Mammal*  
736 *Biol.* 1997; 62: 192-197(Suppl.2).
- 737 **51.** Zhao Z-J, Hambly C, Shi L-L, Bi Z-Q, Cao J, Speakman JR. Late lactation in  
738 small mammals is a critically sensitive window of vulnerability to elevated  
739 ambient temperature. *Proc Natl Acad Sci U S A.* 2020;117(39):24352-24358.  
740 [doi:10.1073/pnas.2008974117](https://doi.org/10.1073/pnas.2008974117).
- 741 **52.** Hamid, HY, Zakaria, MZAB, Meng GY, Haron, AW, Mustapha, NM. Effects of  
742 elevated ambient temperature on reproductive outcomes and offspring  
743 growth depend on exposure time. *ScientificWorldJournal.* 2012; 2012: 359134.  
744 [doi:10.1100/2012/359134](https://doi.org/10.1100/2012/359134).
- 745 **53.** Ohrnberger SA, Monclus R, Rödel HG, Valencak TG. Ambient temperature  
746 affects postnatal litter size reduction in golden hamsters. *Front Zool.*  
747 2016; 13: 51. [doi:10.1186/s12983-016-0183-8](https://doi.org/10.1186/s12983-016-0183-8).
- 748 **54.** Ohrnberger SA, Brinkmann K, Palme R, Valencak TG. Dorsal shaving affects  
749 concentrations of faecal cortisol metabolites in lactating golden hamsters.  
750 *Naturwissenschaften.* 2018; 105(1-2): 13. [doi:10.1007/s00114-017-1536-7](https://doi.org/10.1007/s00114-017-1536-7).
- 751 **55.** Krol E and Speakman JR. Limits to sustained energy intake VI. Energetics of  
752 lactation in laboratory mice at thermoneutrality. *J Exp Biol.* 2003a; 206: 4255-  
753 4266. [doi:10.1242/jeb.00674](https://doi.org/10.1242/jeb.00674).
- 754 **56.** Yang D-B, Li L, Wang L-P, Chi Q-S, Hambly C, Wang D-H, Speakman JR.  
755 Limits to sustained energy intake. XIX. A test of the heat dissipation limitation  
756 hypothesis in Mongolian gerbils (*Meriones unguiculatus*). *J Exp Biol.*  
757 2013; 216: 3358-3368. [doi:10.1242/jeb.085233](https://doi.org/10.1242/jeb.085233).
- 758 **57.** Wen J, Tan S, Qiao Q-G, Fan W-J, Huang Y-X, Cao J, Liu J-S, Wang Z-X,  
759 Zhao Z-J. Sustained energy intake in lactating Swiss mice: a dual modulation  
760 Process. *J Exp Biol.* 2017; 220, 2277-2286. [doi:10.1242/jeb.157107](https://doi.org/10.1242/jeb.157107).

- 761 **58.** Valencak TG, Wright P, Weir A, Mitchell SE, Vaanholt LM, Hambly C, Król E,  
762 Speakman JR. Limits to sustained energy intake. XXI. Effect of exposing the  
763 mother, but not her pups, to a cold environment during lactation in mice.  
764 J Exp Biol. 2013; 216: 4326-4333. [doi:10.1242/jeb.092023](https://doi.org/10.1242/jeb.092023).
- 765 **59.** Zhao ZJ, Song DG, Su ZC, Wei WB, Liu XB, Speakman JR. Limits to  
766 sustained energy intake. XVIII. Energy intake and reproductive output during  
767 lactation in Swiss mice raising small litters. J Exp Biol. 2013; 216: 2349-  
768 2358. [doi:10.1242/jeb.078436](https://doi.org/10.1242/jeb.078436).
- 769 **60.** Sadowska J, Gebczynski AK, Lewoc M, Konarzewski M. Not that hot after all:  
770 no limits to heat dissipation in lactating mice selected for high or low BMR. J  
771 Exp Biol (2019); 222, jeb204669. [doi:10.1242/jeb.204669](https://doi.org/10.1242/jeb.204669).
- 772 **61.** Krol E, Johnson MS, Speakman JR. Limits to sustained energy intake VIII.  
773 Resting metabolic rate and organ morphology of laboratory mice lactating at  
774 thermoneutrality. J Exp Biol. 2003; 206: 4283-4291. [doi:10.1242/jeb.00676](https://doi.org/10.1242/jeb.00676).
- 775 **62.** Krol E and Speakman JR. Limits to sustained energy intake VII. Milk energy  
776 output in laboratory mice at thermoneutrality. J Exp Biol. 2003b; 206: 4267-  
777 4281. [doi:10.1242/jeb.00675](https://doi.org/10.1242/jeb.00675).
- 778 **63.** Zhao Z-J, Li L, Yang D-B, Chi Q-S, Hambly C, Spaekman JR. Limits to  
779 sustained energy intake XXV: milk energy output and thermogenesis in Swiss  
780 mice lactating at thermoneutrality. Sci Rep. 2016; 6:31626.  
781 [doi:10.1038/srep31626](https://doi.org/10.1038/srep31626).
- 782 **64.** Harrison GA, Morton RJ, Weiner JS. The growth in weight and tail length of  
783 inbred and hybrid mice reared at two different temperatures i. Growth in weight  
784 ii. Tail length. Philos Trans R Soc Lond B Biol Sci. 1959; 242(695):479-516.  
785 [www.jstor.org/stable/2992606](http://www.jstor.org/stable/2992606).
- 786 **65.** Skop V, Liu N, Guo J, Gavrilova O, Reitman ML. The contribution of the  
787 mouse tail to thermoregulation is modest. Am J Physiol Endocrinol Metab.  
788 2020; 319:E438–E446. [doi:10.1152/ajpendo.00133.2020](https://doi.org/10.1152/ajpendo.00133.2020).
- 789 **66.** Möstl E, Palme R. Hormones as indicators of stress. Dom Anim Endocrinol.  
790 2002; 23: 67-74. [doi:10.1016/s0739-7240\(02\)00146-7](https://doi.org/10.1016/s0739-7240(02)00146-7).
- 791 **67.** Rabiee AR, Dalley D, Borman JM, Macmillan KL, Schwarzenberger F.  
792 Progesterone clearance rate in lactating dairy cows with two levels of

- 793 dry matter and metabolisable energy intakes. *Anim Reprod Sci.* 2002; 72: 11–  
794 25. [doi:10.1016/s0378-4320\(02\)00067-2](https://doi.org/10.1016/s0378-4320(02)00067-2).
- 795 **68.** Lepschy M, Touma C, Palme R. Faecal glucocorticoid metabolites: how to  
796 express yourself - comparison of absolute amounts versus concentrations in  
797 samples from a study in laboratory rats. *Lab Anim.* 2010; 44(3): 192-198.  
798 [doi:10.1258/la.2009.009082](https://doi.org/10.1258/la.2009.009082).
- 799 **69.** Kokolus KM, Spangler HM, Povinelli BJ, Farren MR, Lee KP, Repasky EA.  
800 Stressful presentations: Mild cold stress in laboratory mice influences  
801 phenotype of dendritic cells in naïve and tumor-bearing mice.  
802 *Front Immunol.* 2014; 5: 23. [doi:10.3389/fimmu.2014.00023](https://doi.org/10.3389/fimmu.2014.00023).
- 803 **70.** Leigh ND, Kokolus KM, O'Neill RE , Du W , Eng JW-L , Qiu J , Chen GL,  
804 McCarthy PL, Farrar JD , Cao X , Repasky EA. Housing temperature-induced  
805 stress is suppressing murine graft-versus-host disease through  $\beta$ 2-adrenergic  
806 receptor signaling. *J Immunol.* 2015; 195(10): 5045-5054.  
807 [doi:10.4049/jimmunol.1500700](https://doi.org/10.4049/jimmunol.1500700).
- 808 **71.** Turner JG, Parrish JL, Hughes LF, Toth LA, Caspary DM. Hearing in  
809 laboratory animals: Strain differences and nonauditory effects of noise.  
810 *Comp Med.* 2005; 55(1): 12–23.
- 811 **72.** Wersinger SR and Martin LB. Optimization of laboratory conditions for the  
812 study of social behavior. *ILAR J.* 2009; 50(1): 64-80. [doi:10.1093/ilar.50.1.64](https://doi.org/10.1093/ilar.50.1.64).
- 813 **73.** Castelhana-Carlos MJ and Baumans V. The impact of light, noise, cage  
814 cleaning and in-house transport on welfare and stress of laboratory rats. *Lab*  
815 *Anim.* 2009; 43: 311–327. [doi:10.1258/la.2009.0080098](https://doi.org/10.1258/la.2009.0080098).
- 816 **74.** Mansfield KG, Riley LK, Kent ML. Detection, impact, and control of specific  
817 pathogens in animal resource facilities. *ILAR J.* 2010; 51(2): 171-179.  
818 [doi:10.1093/ilar.51.2.171](https://doi.org/10.1093/ilar.51.2.171).
- 819 **75.** Gordon CJ, Puckett ET, Repasky ES, Johnstone AFM. A device that allows  
820 rodents to behaviorally thermoregulate when housed in vivariums. *JAALAS.*  
821 2017; 56(2): 173-176.

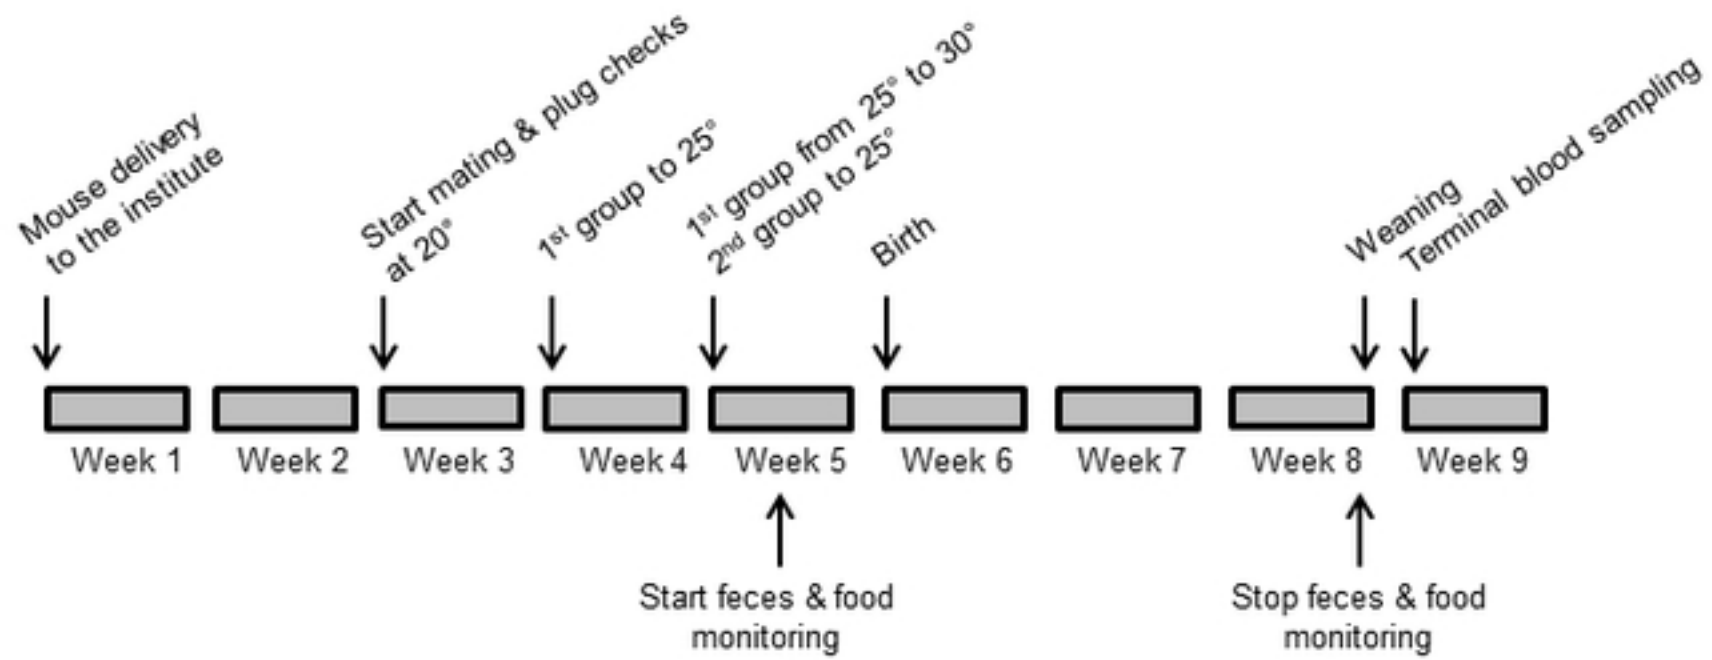

Figure



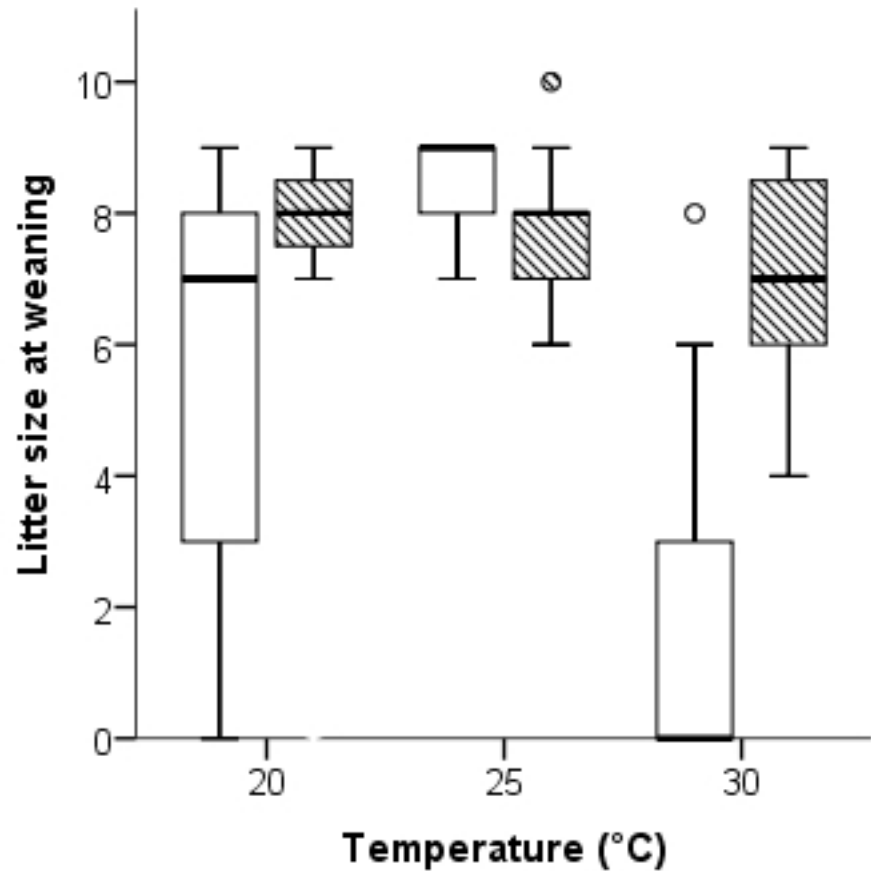

Figure

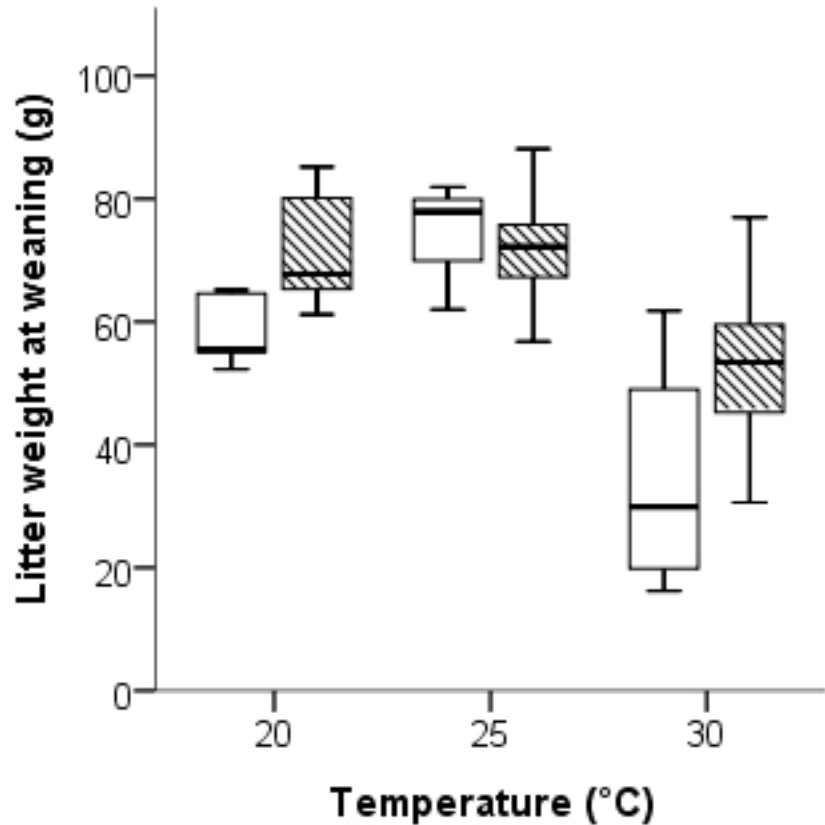

Figure

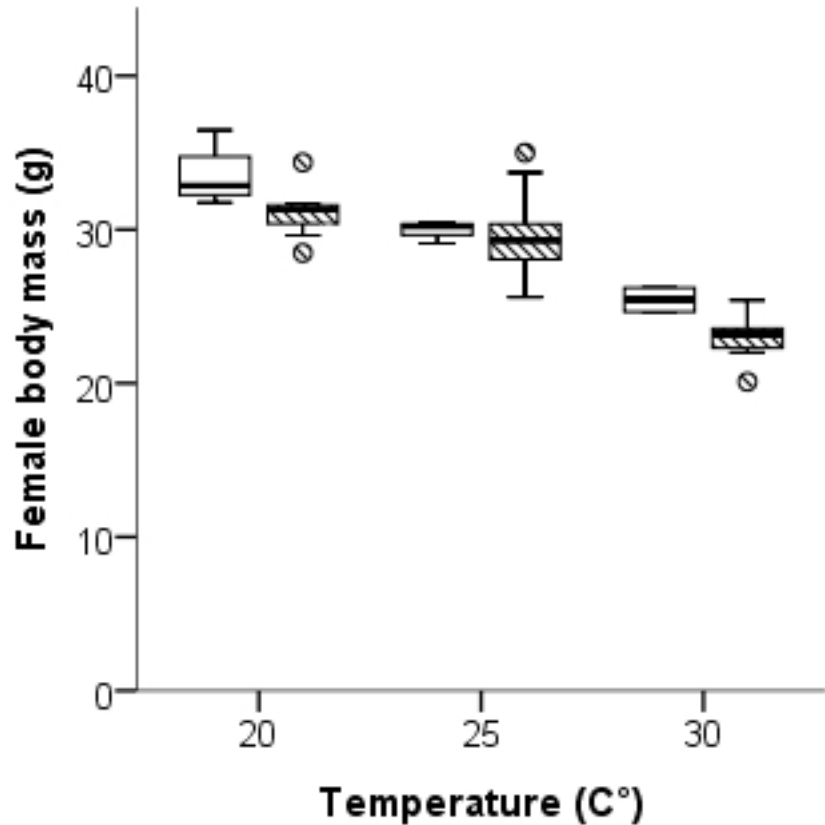

Figure

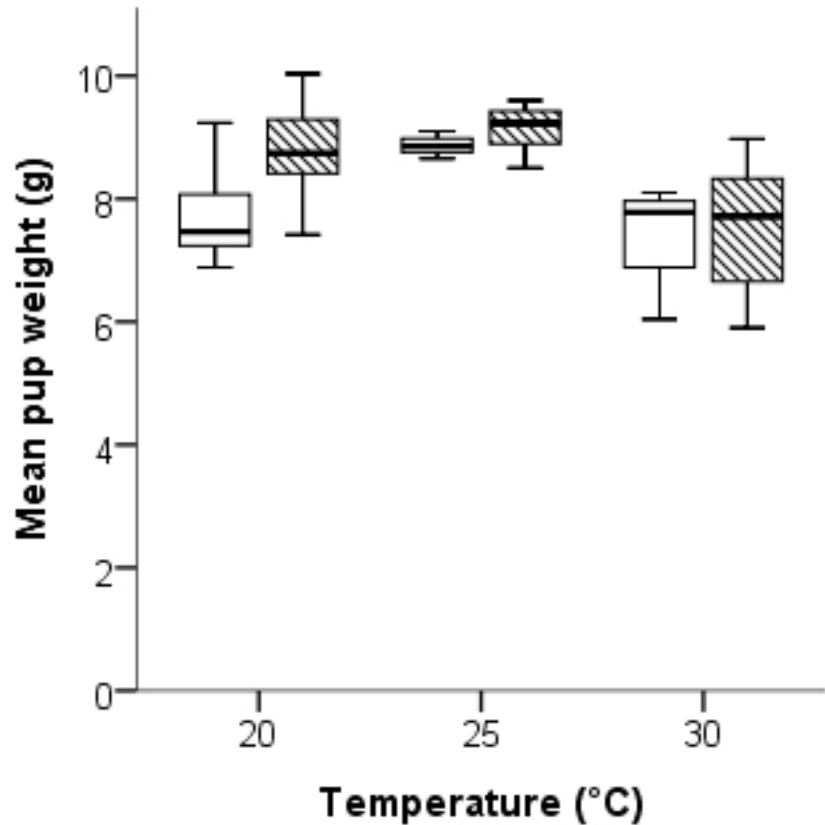

Figure

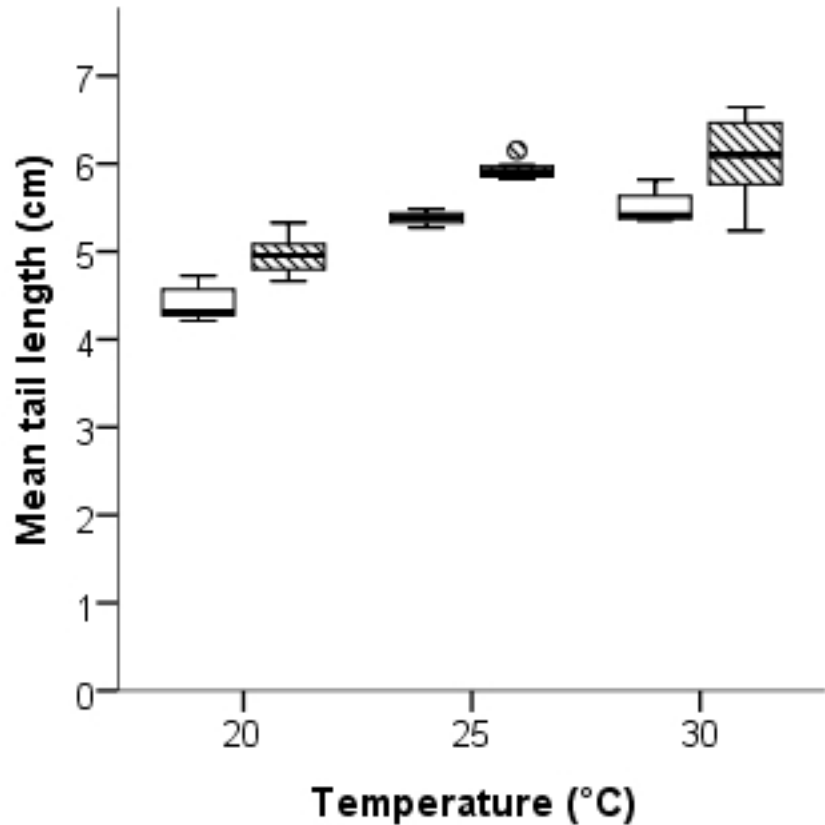

Figure

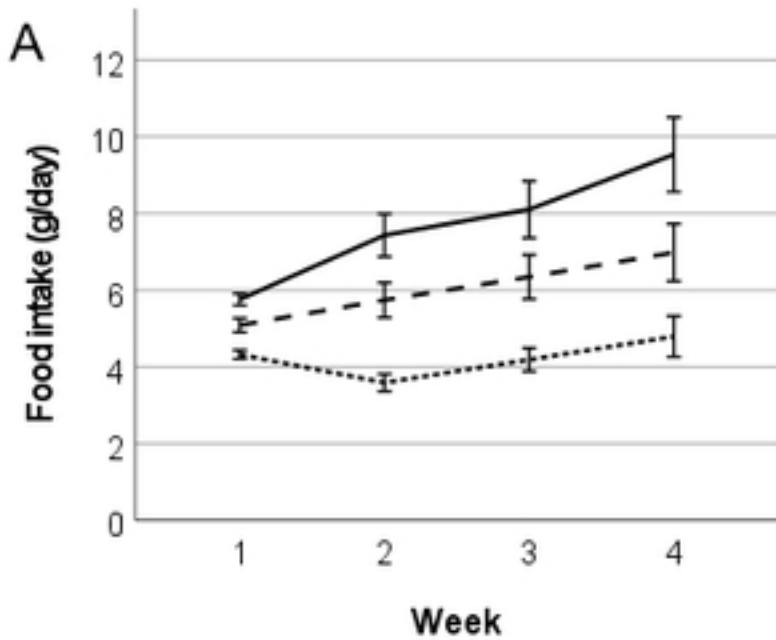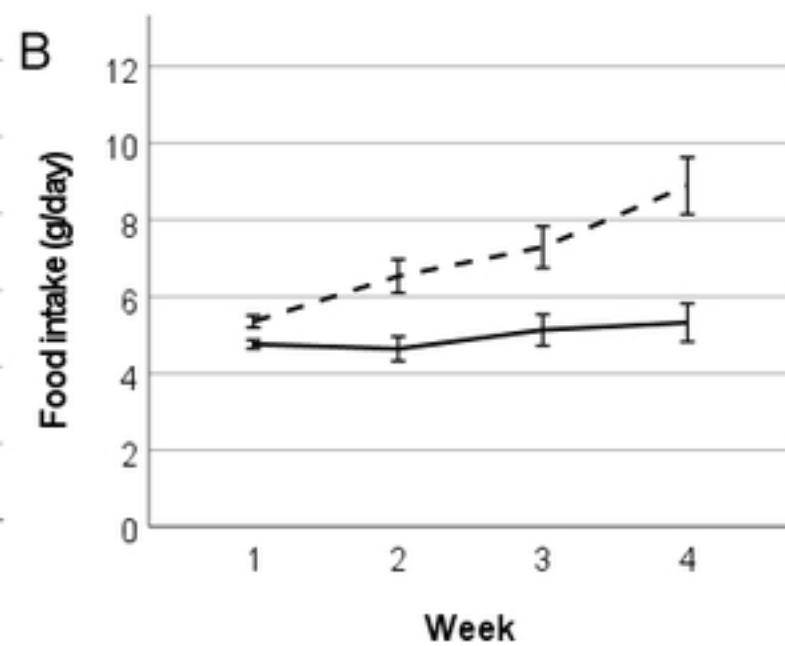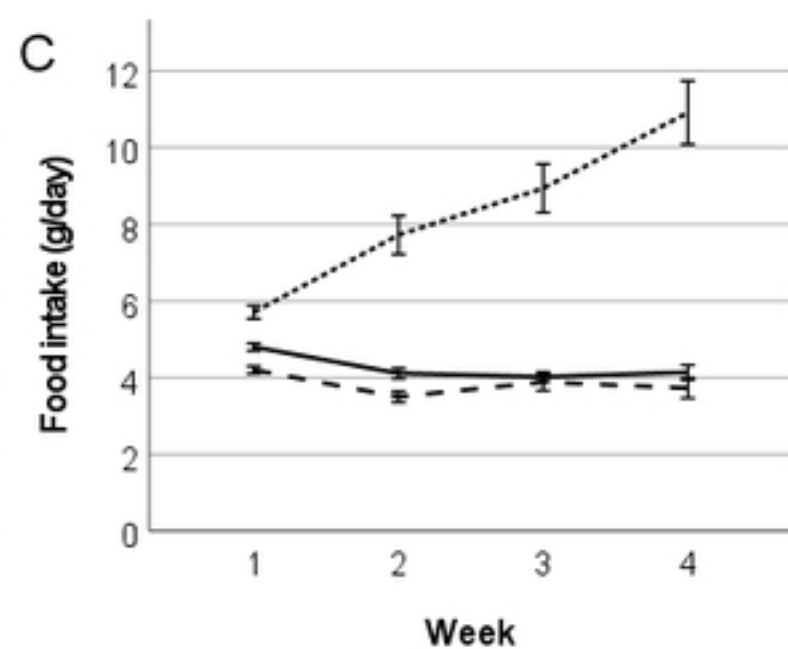

Figure

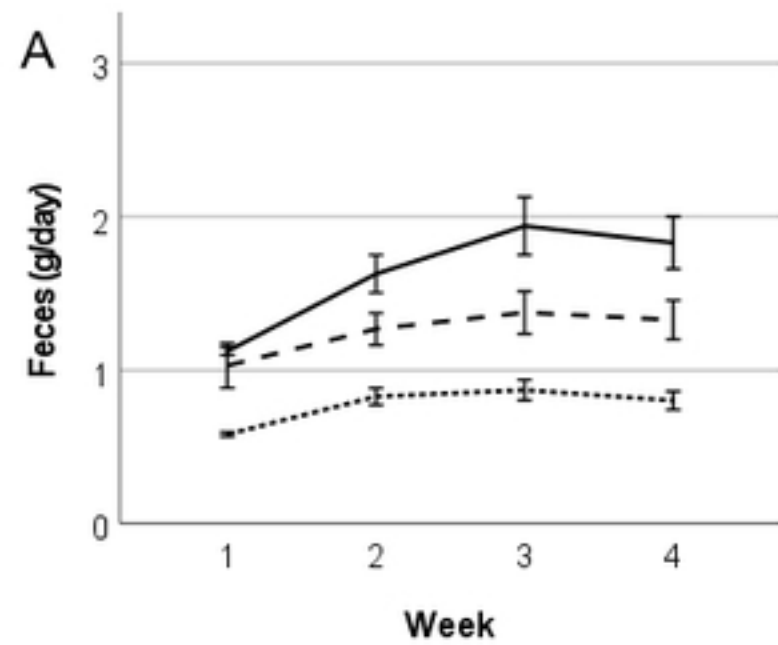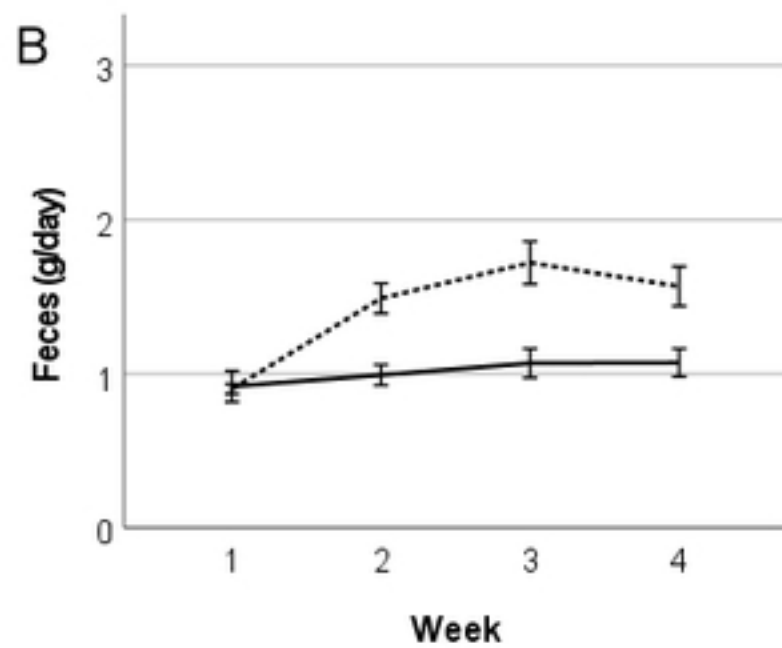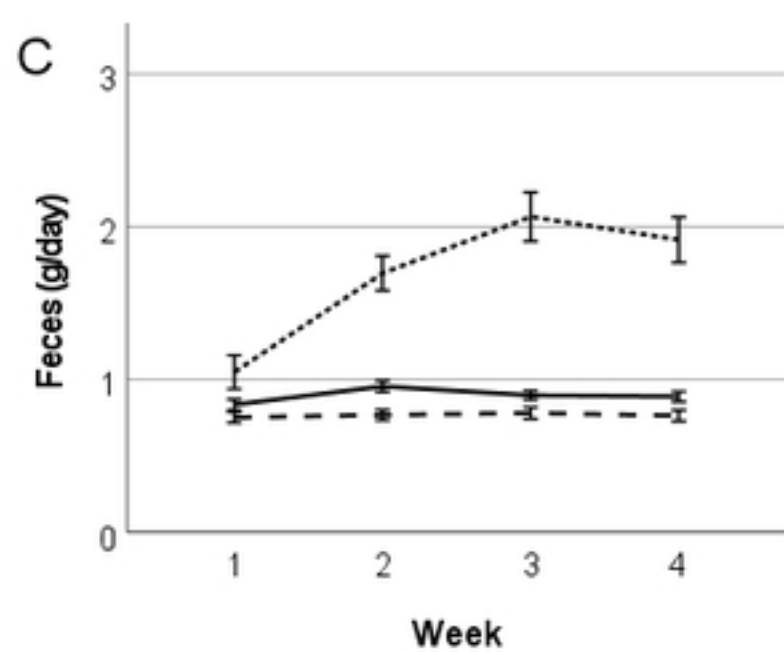

Figure

**A**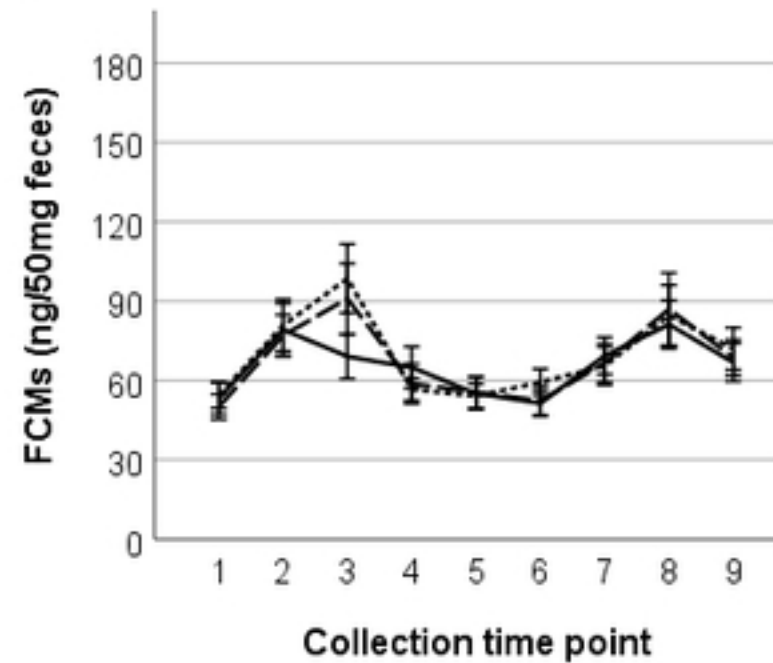**B**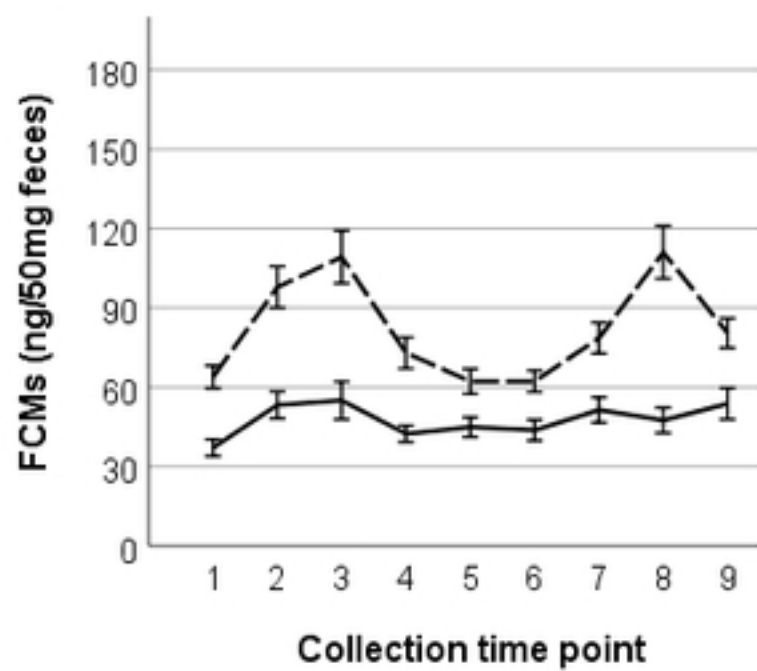**C**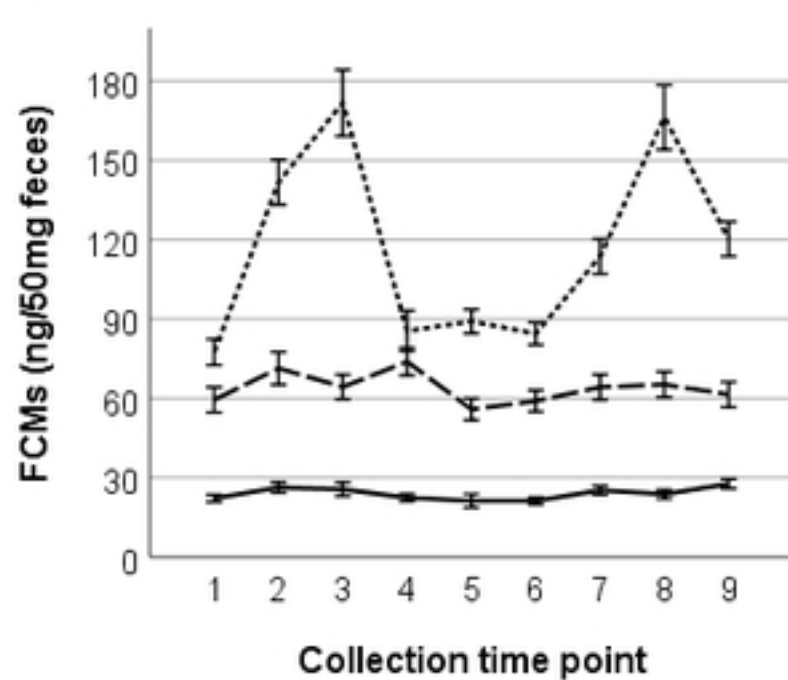**Figure**
